1 **TITLE OF PAPER:** Genetic Variant rs1205 is Associated with COVID-19 Outcomes:  
2 The Strong Heart Study and Strong Heart Family Study.

3 **AUTHORS:** Best LG,<sup>1,2</sup> Erdei E,<sup>3</sup> Haack K,<sup>4</sup> Kent JW Jr.,<sup>4</sup> Malloy K,<sup>5</sup> Newman DE,<sup>4</sup>  
4 O'Leary M,<sup>1</sup> O'Leary R,<sup>1</sup> Sun Q,<sup>6</sup> Navas-Acien A,<sup>7</sup> Franceschini N,<sup>8</sup> and Cole SA,<sup>4</sup>  
5

6  
7 <sup>1</sup> Epidemiology Division, Missouri Breaks Industries Research, Inc. Eagle Butte, SD,  
8 USA <sup>2</sup> Pathology Department, University of North Dakota, Grand Forks, ND, USA  
9 <sup>3</sup> Pharmaceutical Sciences, University of New Mexico - Albuquerque, Albuquerque, New  
10 Mexico, USA. <sup>4</sup> Population Health Program, Texas Biomedical Research Institute, San  
11 Antonio, TX, USA. <sup>5</sup> Center for American Indian Health Research, Department of  
12 Biostatistics and Epidemiology, Hudson College of Public Health, University of  
13 Oklahoma Health Sciences Center, Oklahoma City, OK, USA. <sup>6</sup> Department of  
14 Biostatistics, University of North Carolina at Chapel Hill, Chapel Hill, NC, USA,  
15 <sup>7</sup> Department of Environmental Health Science, Mailman School of Public Health,  
16 Columbia University, NY, New York, USA. <sup>8</sup> Department of Epidemiology, University of  
17 North Carolina at Chapel Hill, Chapel Hill, NC, USA.  
18

19

20 Abstract:

21 Background: Although COVID-19 infection has been associated with a number of  
22 clinical and environmental risk factors, host genetic variation has also been associated  
23 with the incidence and morbidity of infection. The *CRP* gene codes for a critical  
24 component of the innate immune system and *CRP* variants have been reported  
25 associated with infectious disease and vaccination outcomes. We investigated possible  
26 associations between COVID-19 outcome and a limited number of candidate gene  
27 variants including rs1205.

28 Methodology/Principal Findings: The Strong Heart and Strong Heart Family studies  
29 have accumulated detailed genetic, cardiovascular risk and event data in geographically  
30 dispersed American Indian communities since 1988. Chi-square tests, logistic  
31 regression and generalized linear mixed models (implemented in SOLAR) were used in  
32 analysis. Genotypic data and 91 COVID-19 adjudicated deaths or hospitalizations from  
33 2/1/20 through 3/1/23 were identified among 3,780 participants in two subsets. Among  
34 21 candidate variants including genes in the interferon response pathway, *APOE*,  
35 *TMPRSS2*, *TLR3*, the HLA complex and the ABO blood group, only rs1205, a 3'  
36 untranslated region variant in the *CRP* gene, showed nominally significant association  
37 in T-dominant model analyses (odds ratio 1.859, 95%CI 1.001-3.453, p=0.049) after  
38 adjustment for age, sex, center, body mass index, and a history of cardiovascular  
39 disease. Within the younger subset, association with the rs1205 T-Dom genotype was  
40 stronger, both in the same adjusted logistic model and in the SOLAR analysis also  
41 adjusting for other genetic relatedness.

42 Conclusion: A T-dominant genotype of rs1205 in the *CRP* gene is associated with  
43 COVID-19 death or hospitalization, even after adjustment for relevant clinical factors  
44 and potential participant relatedness. Additional study of other populations and genetic  
45 variants of this gene are warranted.

46 Author summary:

47 Considerable inter-individual variability in COVID-19 clinical outcome has been noted  
48 from the onset of this pandemic. Some risk factors, such as age, diabetes, obesity, prior  
49 cardiovascular disease (CVD) are well established. The possibility of inherited, host  
50 genetic risk factors has also been examined and a number validated in very large,  
51 population based datasets. The present study leveraged on-going clinical surveillance  
52 of CVD and available genetic information in an American Indian population to  
53 investigate potential host genetic contributors to COVID-19 morbidity and mortality.  
54 Although the number of cases ascertained was relatively small, a novel variant in the C-  
55 reactive protein gene was found to be associated with COVID-19 outcome. This protein  
56 constitutes a critical component of the innate immune system and *CRP* variants have  
57 been reported associated with infectious disease and vaccination outcomes. Improved  
58 understanding of the pathophysiology of this infection may allow more targeted therapy.

59

## 60 Introduction

61 The ongoing pandemic of Severe Acute Respiratory Syndrome Coronavirus 2  
62 (SARS-CoV-2) infections has taken a devastating toll on American Indian, Alaskan  
63 Native (AI/AN) populations, with hospitalization and death rate ratios for COVID-19  
64 (compared with White ethnicity) reported as 2.5 fold; and 2.1 fold, respectively.[1]

65 A number of demographic and clinical characteristics, such as male gender,  
66 socio-economic deprivation, diabetes, cardiovascular disease and obesity, have been  
67 identified as risk factors for COVID-19 associated morbidity and mortality.[2] The  
68 hypothesis that this increased burden of COVID-19 morbidity and mortality among  
69 ethnic minorities is due to the increased prevalence of these co-morbidities in many  
70 populations, has been considered; but the proportion of effect attributable to clinical co-  
71 morbidities may, be small.[2] In spite of considerable interest in possible host genetic  
72 factors that influence the severity of COVID-19 among all patients, there have been few  
73 reliably replicating studies in specific racial/ethnic groups.[3]

74 The expectation that ethnic disparities in COVID-19 outcomes are primarily  
75 driven by population specific behavioral or clinical burden of disease may have resulted  
76 in less interest in investigating genetic susceptibility among AI/AN communities. This is  
77 of importance for the possible identification of therapeutic targets and prevention  
78 strategies assisting AI/AN as well as other populations.

79 The Strong Heart Study (SHS) and allied Strong Heart Family Study (SHFS),  
80 comprise the largest, ongoing prospective epidemiological cohort study among  
81 American Indians in 12 different Tribal communities located in Arizona, North and South  
82 Dakotas, and in Oklahoma. These cohorts have the requisite genetic datasets and  
83 ongoing surveillance of medical records for cardiovascular disease (CVD) and risk  
84 factors, including COVID-19, to also assess genetic contributions to COVID-19 death  
85 and morbidity risks. The present results derive from a case/cohort analysis of SNPs  
86 reported associated with COVID mortality or morbidity in other populations.

87

## 88 Materials and Methods

### 89 *Participants and Cohorts*

90 The SHS/SHFS methodology and design has been described previously.[4,5]  
91 Diabetes and hypertensive status were defined as previously;[6] and the dichotomous  
92 CVD covariate indicates any history of myocardial infarction, coronary artery disease,  
93 congestive heart failure, and atherosclerotic stroke and peripheral vasculature  
94 disease.[7] While SHS/SHFS medical record surveillance of participants focuses on  
95 ascertainment of outcome events and clinical risk factors related to CVD, in early 2020  
96 ascertainment for COVID-19 was begun, with the recognition of a bidirectional  
97 relationship between CVD and COVID-19 infection. The physicians conducting medical  
98 records reviews identified COVID-19 as either a contributing or definitive factor in death

99 or hospitalization (disease severity). However, medical record review was triggered  
100 primarily by CVD related events (for ascertainment criteria, see Lee et al [4]) and a  
101 small number of other conditions, but not primarily by infections. Thus, the identified  
102 COVID-19 endpoint of hospitalization is probably under-reported, given the surveillance  
103 focus on CVD outcomes. However, all deaths associated with COVID-19 during the  
104 study period are included in this report.

105 The study period was 2/1/2020 through 3/1/2023, when medical record reviews  
106 ascertaining COVID-19 outcomes were available. We included all participants alive on  
107 2/1/2020 and identified outcome events (either COVID-19 death or hospitalization)  
108 during follow-up. There were no specific ICD-9/10 codes used to identify relevant  
109 morbid COVID-19 cases, but physician review of the medical record determined  
110 COVID-19 case status based on immune measures and clinical diagnoses, with morbid  
111 events for review selected on the basis of standard SHS protocol to ascertain incident  
112 CVD.[4]

### 113 *Rationale for genetic variants selected*

114 A PubMed literature search for candidate variants previously reported to be  
115 associated with COVID-19 pathogenesis or clinical outcomes found previously  
116 implicated genes in the interferon response pathway,[8,9] *APOE*,[10] *TMPRSS2*,[11]  
117 *TLR3*,[9] *ACE*,[12] *FURIN*[13] and the human leukocyte antigen (HLA)[14,15] regions.  
118 We also included ABO blood group polymorphisms which have been among the most  
119 consistently identified host factors influencing the COVID-19 phenotype.[16-18] The top  
120 17 "hits" of of the Covid-19 Host Genetics Initiative Browser, round 7 identified  
121 additional variants of interest.[19]

122 Thus our literature search developed a total of 73 plausible candidate variants  
123 and resulted in 21 polymorphisms that were available from the genetic resources of the  
124 SHS, albeit within two subsets of participants that were genotyped in SHS/SHFS  
125 substudies. The candidate SNPs and identifying, published references are found in  
126 Table 1.

127

128 **Table 1. Variants genotyped, (associated genes) and allele frequency (AF), when**  
129 **the genotype is available.**

| Variant (gene)                             | RISK ALLELE | SHFS AF of risk allele | SHS AF of risk allele | Literature citation |
|--------------------------------------------|-------------|------------------------|-----------------------|---------------------|
| rs16944971 ( <i>FURIN</i> )                | C           | 0.01                   | NA*                   | [13,20]             |
| rs7412 ( <i>APOE</i> )                     | C           | 0.02                   | NA                    | [3,21]              |
| rs1205 ( <i>CRP</i> ), alternate allele =T | C           | 0.49                   | 0.46                  | [22-25]             |
| rs3091244 ( <i>CRP</i> )                   | G           | 0.31                   | NA                    | [26-28]             |

|                                |           |      |        |               |
|--------------------------------|-----------|------|--------|---------------|
| rs3093068 (CRP)                | G         | NA   | 0.01   | [29,30]       |
| rs1800947 (CRP)                | C         | NA   | 0.02   | [23,25,29,31] |
| rs201253322 (IRF7)             | C         | NA   | <0.001 | [3,9]         |
| rs116302758 (DPP4)             | T         | NA   | 0.02   | [11]          |
| rs56179129 (DPP4)              | C         | NA   | 0.002  | [11]          |
| rs12329760 (TMPRSS2)           | C         | NA   | 0.20   | [11,13,32]    |
| rs150892504 (ERAP2)            | C         | NA   | 0.001  | [33,34]       |
| rs1800795 (IL-6)               | G         | NA   | 0.08   | [23,35,36]    |
| rs1799752 (ACE)                | Insertion | NA   | 0.26   | [3,13]        |
| rs8176719 (ABO, O allele)      | Insertion | NA   | 0.76   | [16,37]       |
| rs8176746 (ABO, B allele)      | G         | 0.02 | 0.02   | [38,39]       |
| rs10735079 (OAS3)              | A         | NA   | 0.13   | [40,41]       |
| rs1405655 (NR1H2)              | G         | NA   | 0.45   | [42]          |
| rs1886814 (FOXP4-AS1)          | A         | NA   | 0.41   | [40]          |
| rs2109069 (DPP9)               | G         | NA   | 0.22   | [41,42]       |
| rs9380142 (HLA-G)              | A         | NA   | 0.32   | [40,41]       |
| rs111837807 (CCHCR1)           | A         | NA   | 0.20   | [42,43]       |
| rs2071351 (HLA-DPA1)           | A         | NA   | 0.08   | [40]          |
| rs529565 (ABO, intron variant) | A         | NA   | 0.23   | [40]          |
| rs10774671 (OAS1)              | A         | NA   | 0.13   | [40]          |
| rs61667602 (LINC02210-CRHR1)   | A         | NA   | 0.06   | [42]          |

130 \* NA, Not available in this cohort

131

132 Although genotypes were derived from extensive microarray sources, no attempt  
133 was made to screen or identify variants of interest on the basis of genome-wide analysis  
134 of SHS microarray data.

135 The only exception to the qualification of previously identified association was the  
136 choice of *CRP* polymorphisms as explained below. This was felt to be justified due to  
137 the central role of *CRP* in the innate immune system and dramatic elevation during  
138 COVID-19 and other viral infections.[43]

139 C-reactive protein (*CRP*) levels are typically thought of as a biomarker for  
140 inflammatory response and not as a pathogenetic factor, although inherited *CRP*  
141 variants have been associated with, and thus possibly a modifying factor in some  
142 infections[22,23] response to vaccination,[26] as well as other conditions such as  
143 cancer[44,45] and pre-eclampsia.[46,47] For this reason, we selected 4 available  
144 variants related to *CRP* expression for our analysis.

#### 145 *Laboratory methods and considerations*

146 Clinical, anthropometric and laboratory measures are reported as obtained from  
147 the most recent SHS exam prior to the study period. Laboratory methodology for  
148 determination of serum creatinine,[48] HgbA1c[49] and high sensitivity C-Reactive  
149 Protein (hsCRP)[50] have been reported previously

150 The SHFS [5] participants were genotyped with the Illumina Human Cardio-  
151 Metabo BeadChip microarray (Illumina, San Diego, CA), incorporating approximately  
152 200,000 single nucleotide polymorphisms (SNPs) in loci previously identified as  
153 significantly associated with metabolic and CVD traits.[51] These genotypes were  
154 generated exclusively from SHFS participants without diabetes mellitus during exams  
155 between 1997-2003. Further details related to quality filters and data preparation have  
156 been published.[50]

157 The SHS participants were genotyped using the Illumina Infinium Multi-Ethnic  
158 Global-8 vs1. Quality control included filtering variants with call rates <95% and  
159 duplicated QC samples. The *CRP* rs1205 variant was genotyped from both the SHFS  
160 (N=1,666) and SHS (N=2,114) participants, providing a total of (N=3,780) rs1205  
161 genotypes. This is presented graphically in Figure 1. Except for rs1205 and rs8176746,  
162 genotypic data from other variants were available from either the SHFS or the SHS  
163 participants (Table 1).

164 Figure 1. Venn diagram illustrating relationship between analysis cohorts.

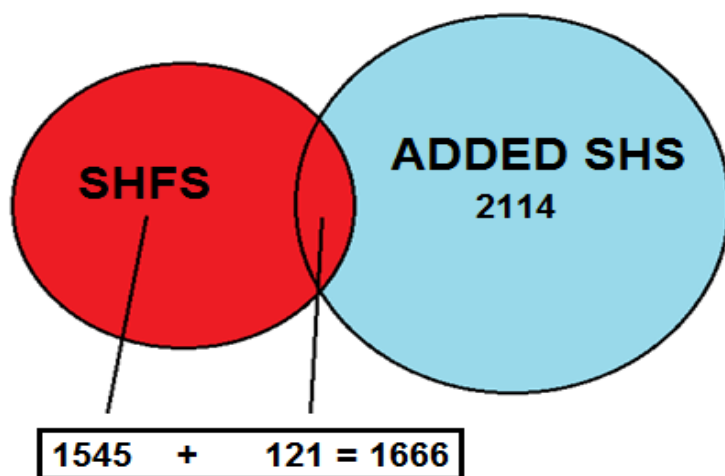

165  
166 Although two different genotyping platforms were used for the SHS and SHFS  
167 participants, the genotyping for both was conducted in the same laboratory at Texas  
168 Biomedical Research Institute in San Antonio, Texas. All 121 participants genotyped for  
169 rs1205 and the ABO variant rs8176746 on both platforms and meeting the criteria for  
170 inclusion in the study had concordant genotyping.

171  
172 *Statistical analysis methods*

173 Descriptive statistics presented counts and percentages for discrete variables  
174 and means with standard deviations for continuous variables. Between-group



175 comparison of continuous variables used T-tests and assumed independent samples.  
176 Discrete variables utilized Pearson chi-square comparisons between groups.

177 Logistic regression models were developed for both univariate and multivariate  
178 analysis of COVID-19 associated death or hospitalization during the observation period  
179 (2/1/20 through 3/29/22). Only a single COVID-event was counted for each participant.  
180 To select covariates included in the final multivariate model, BMI and any history of  
181 CVD were chosen on the basis of apparent independent association ( $p < 0.05$ ) when all  
182 available covariates (sex, body mass index (BMI), hypertension, diabetes mellitus (DM),  
183 impaired fasting glucose (IFG) or normal fasting glucose (NFG), history of CVD event,  
184 (tobacco (current, ever, never), serum creatinine, and hemoglobin A1c (HgbA1c)) were  
185 considered jointly. Age, sex and center were deemed important, standard adjustments  
186 and therefore kept in models. The covariate related to diabetes and dysglycemia was  
187 not independently associated with COVID-19 when included with BMI (as seen in the  
188 first section of Table 5), so was not retained in the final logistic model. The serum  
189 hsCRP was not included as a covariate, given we were testing *CRP* genetic variants  
190 with known effects on serum levels. Significance was accepted at a p-value of 0.05,  
191 since the genetic variants were chosen on the basis of a priori evidence of potential  
192 association with COVID-19 as well as recognizing the hypothesis driven nature of the  
193 presented analysis.

194 The SHFS cohort enrolled large families, and therefore we accounted for the  
195 relatedness using random effects of pedigree relationships (established with  
196 participants at recruitment) in generalized linear mixed models implemented in  
197 SOLAR.[52,53] For discrete phenotypes such as affection status, SOLAR employs a  
198 classic liability model.[54] Briefly: the unmeasured, presumed multifactorial, basis of  
199 liability to disease is modeled as a standard normal distribution (mean=0, SD=1), with  
200 affected individuals represented by an upper tail of the distribution that has the same  
201 density as the incidence of affection status in the general population. For this study we  
202 used the mean weekly incidence of COVID-19 in the US population during the study  
203 period (217.72 cases/100,000 population, 0.218%)[55] Heritability of liability is  
204 estimated from genetic correlations between relatives[56] and the effects of measured  
205 factors (age, sex, etc., as well as measured genotypes) are estimated as deviations of  
206 the liability threshold from the population incidence.

## 207 *Ethics Statement*

208 All participants in this study have provided written, informed consent to allow  
209 genetic and other research related to CVD and its risk factors. Consent was obtained at  
210 least once in all cases since Phase I of SHS in 1988, and in most instances has been  
211 renewed during each the 6 subsequent phases until the present. Approval has been  
212 obtained from the following institutional review boards (IRB) of record: Arizona Area  
213 Indian Health Service IRB, MedStar Health Research Institute IRB, Great Plains Area  
214 Indian Health Service IRB, Oglala Sioux Tribe Research Review Board, University of  
215 Oklahoma Health Sciences IRB, and Oklahoma Area Indian Health Service IRB. In

216 addition to these formal, IRB approvals, all of the participants' Tribal governments have  
 217 approved the conduct of the SHS/SHFS studies for these purposes. The close  
 218 association between CVD (especially stroke) and COVID-19 infection, often in a  
 219 bidirectional manner, justified IRB approval for this substudy.

## 220 Results

221 Table 1 shows the genotyped variants selected, their associated genes and allele  
 222 frequencies in the SHFS or SHS cohorts. The characteristics of both the SHS and  
 223 SHFS cohorts are summarized in Table 2.

224 **Table 2. Demographic and clinical measures stratified by enrolled cohort.**

|                                                  | SHFS        | SHS         | Total       | P value            |
|--------------------------------------------------|-------------|-------------|-------------|--------------------|
| Participants, N (%)                              | 1666 (44.1) | 2114 (55.9) | 3780 (100)  |                    |
| Male Sex, N (%)                                  | 660 (39.6)  | 916 (43)    | 1576 (42)   | .021*              |
| Mean Age (SD),<br>years on 2/1/2020              | 52.0 (14.8) | 83.9 (8.4)  | 69.8 (19.7) | <.001**            |
| Mean Age (SD),<br>years at last clinical<br>exam | 41.7 (14.6) | 62.9 (8.7)  | 53.6 (15.7) | <.001              |
| Diabetes status, N,<br>(%)                       |             |             |             | <.001              |
| Diabetes Mellitus<br>(DM)                        | 214 (13)    | 1001 (49)   | 1215 (33)   |                    |
| Impaired fasting<br>glucose tolerance<br>(IFG)   | 347 (21)    | 500 (24)    | 847 (23)    |                    |
| Normal fasting<br>glucose tolerance<br>(NFG)     | 1080 (65)   | 563 (27)    | 1643 (44)   |                    |
| Hypertension, N (%)                              | 470 (28)    | 1110 (53)   | 1580 (42)   | <.001              |
| Cardiovascular<br>disease***<br>N, (%)           | 169 (10)    | 870 (41)    | 1039 (28)   | <.001              |
| Mean BMI (SD),<br>kg/m <sup>2</sup>              | 32.3 (7.7)  | 30.3 (6.5)  | 31.2 (7.1)  | <.001              |
| Current smoker N<br>(%)                          | 644 (39)    | 618 (30)    | 1310 (35)   | 0.657 <sup>Δ</sup> |



|                                                          |                              |                              |                               |                     |
|----------------------------------------------------------|------------------------------|------------------------------|-------------------------------|---------------------|
| Ever smoker, N (%)                                       | 391 (24)                     | 749 (37)                     | 1140 (31)                     | <.001 <sup>ΔΔ</sup> |
| Never smoker, N (%)                                      | 619 (37)                     | 618 (29)                     | 1237 (34)                     |                     |
| Mean serum creatinine (SD), mg/dL                        | 0.87 (0.36)                  | 1.14 (1.22)                  | 1 (0.90)                      | <.001               |
| Mean % HgB A1c (SD)                                      | 6.36 (1.6)                   | 7.10 (2.22)                  | 6.90 (2.10)                   | <.001               |
| Mean hsCRP (SD) <sup>****</sup>                          | 4.12 (3.58)                  | 4.35 (3.31)                  | 4.23 (3.45)                   | .074                |
| COVID-19 any case, N (%)                                 | 48 (2.9)                     | 43 (2.0)                     | 91 (2.4)                      | 0.09                |
| COVID-19 death, N (%)                                    | 21 (1.3)                     | 26 (1.2)                     | 47 (1.2)                      | 0.93                |
| <b>Participants with either fatal or non-fatal COVID</b> |                              |                              |                               |                     |
|                                                          | <b>SHFS</b>                  | <b>SHS</b>                   | <b>Total</b>                  | <b>P value</b>      |
| Male sex, N (%)                                          | 18 (37)                      | 15 (35)                      | 33 (36)                       | 0.796               |
| Mean Age (SD), years on 2/1/2020                         | 61.9 (14.7)                  | 78.1 (5.0)                   | 69.6 (13.8)                   | <0.001              |
| DM/IFG/NFG, N (%)                                        | 19/5/23<br>(40.4,10.6,48.9)  | 17/13/13<br>(39.5,30.2,30.2) | 36/18/36 (40.0,<br>20.0,40.0) | 0.043               |
| HTN, N (%)                                               | 22 (45.8)                    | 21 (48.8)                    | 43 (47.3)                     | 0.774               |
| CVD, N (%)                                               | 13 (27.1)                    | 25 (58.1)                    | 38 (41.8)                     | 0.003               |
| Mean BMI (SD)                                            | 36.07 (9.10)                 | 31.04 (6.64)                 | 33.7 (8.38)                   | 0.001               |
| Smoking<br>Current/ever/never (%)                        | 15/15/18<br>(31.3,31.3,37.5) | 14/11/18<br>(32.6,25.6,41.9) | 29/26/36<br>(31.9,28.6,39.6)  | 0.828               |
|                                                          |                              |                              |                               |                     |
| Serum Creatinine (SD), mg/dL                             | 0.85 (0.20)                  | 1.12 (1.86)                  | 0.98 (1.27)                   | 0.362               |
| Mean HgbA1c (SD), %                                      | 7.44 (2.14)                  | 6.65 (1.74)                  | 7.00 (1.95)                   | 0.191               |

|                           |             |             |             |       |
|---------------------------|-------------|-------------|-------------|-------|
| Mean hsCRP (SD), mg/L**** | 5.00 (3.78) | 4.48 (3.40) | 4.76 (3.60) | 0.715 |
|---------------------------|-------------|-------------|-------------|-------|

225 Values are mean (SD) or N (%). \* Pearson chi square test for count data. \*\*T-  
 226 test for mean (SD) data \*\*\* Any history of coronary heart disease, stroke, congestive  
 227 heart failure, or other cardiovascular disease <sup>Δ</sup> smoking "current" vs smoking "never" <sup>ΔΔ</sup>  
 228 smoking "ever" vs smoking "never" \*\*\*\* hsCRP values >15mg/L excluded

229

230 Unadjusted results limited to the primary variant of interest from the SHFS, the  
 231 SHS cohort or combined SHFS/SHS cohorts, using additive and dominant models  
 232 based on risk or non-risk alleles are shown in Table 3.

233

234 **Table 3. Primary results of interest, rs1205: univariant associations with either**  
 235 **fatal or non-fatal COVID-19.**

| Cohort          | SNP           | Risk allele | Model        | Chi-square p value* | OR**         | 95% CI               | P value      |
|-----------------|---------------|-------------|--------------|---------------------|--------------|----------------------|--------------|
| SHS             | rs1205        | C           | Add          | 0.564               | 0.922        | 0.603 - 1.411        | 0.709        |
| SHS             | rs1205        | C           | C-DOM        | 0.815               | 1.084        | 0.553 - 2.124        | 0.815        |
| SHS             | rs1205        | T           | T-DOM        | 0.368               | 1.452        | 0.642 - 3.285        | 0.370        |
| <b>SHFS</b>     | <b>rs1205</b> | <b>C</b>    | <b>Add</b>   | <b>0.039</b>        | <b>0.599</b> | <b>0.396 - 0.906</b> | <b>0.015</b> |
| SHFS            | rs1205        | C           | C-DOM        | 0.099               | 0.609        | 0.336 - 1.104        | 0.102        |
| <b>SHFS</b>     | <b>rs1205</b> | <b>T</b>    | <b>T-DOM</b> | <b>0.016</b>        | <b>2.976</b> | <b>1.171 - 7.565</b> | <b>0.022</b> |
| SHS/SHFS        | rs1205        | C           | Add          | 0.066               | 0.743        | 0.553 - 0.998        | 0.049        |
| SHS/SHFS        | rs1205        | C           | C-DOM        | 0.332               | 0.804        | 0.516 - 1.251        | 0.333        |
| <b>SHS/SHFS</b> | <b>rs1205</b> | <b>T</b>    | <b>T-DOM</b> | <b>0.020</b>        | <b>2.038</b> | <b>1.105 - 3.758</b> | <b>0.023</b> |

236

237 \* Pearson chi-square, asymptotic significance, two-sided

238 \*\* OR: univariate logistic regression odds ratio

239

240 Results for the remaining variants are found in Supplemental Table S1. For  
 241 variants with low frequency, logistic models were often unstable and not reported.  
 242 Analyses in the SHFS cohort showed nominally significant associations for the rs1205 T  
 243 allele dominant (T-Dom) genotype in the combined SHFS/SHS cohort and both additive  
 244 and T-Dom models in the SHFS cohort).

245 Table 4 shows the distribution of COVID-19 cases among recruitment centers,  
 246 highlighting the relatively larger number of cases identified in the Dakota center  
 247 compared to other centers, and provides the allelic prevalence of rs1205 by center.

248 Among the combined SHFS/SHS cohorts, the prevalence of the rs1205 T allele was  
 249 0.525 (95% CI 0.51 - 0.54).

250

251 **Table 4. Combined SHFS/SHS participant and SNP results from adjusted analysis**  
 252 **by recruitment center.**

| Center*                                 | AZ                 | DK                 | OK                 | p value | analysis |
|-----------------------------------------|--------------------|--------------------|--------------------|---------|----------|
| N                                       | 488                | 1705               | 1587               |         |          |
| Age mean (SD)                           | 70.65 (19.48)      | 68.39 (20.29)      | 71.13 (19.05)      | <0.001  | 1        |
| Male sex N (%)                          | 184 (38)           | 734 (43)           | 658 (41)           | 0.104   | 2        |
| BMI mean (SD)                           | 34.78 (9.88)       | 30.25 (6.36)       | 31.15 (6.55)       | <0.001  | 1        |
| ANY_CVD_YN N(%)                         | 119 (24)           | 547 (32)           | 373 (23)           | <0.001  | 2        |
| SHFS cohort N(%)                        | 165 (34)           | 698 (44)           | 803 (47)           | <0.001  | 2        |
| Fatal/non-fatal COVID-19 N (% of total) | 11 (12.1)          | 62 (68.1)          | 18 (19.8)          | <0.001  | 2        |
| Risk of outcome % (95% CI)              | 2.25% (0.94-3.57)  | 3.64% (2.75-4.52)  | 1.13% (0.61-1.66)  |         | 3        |
| rs1205,C allele count (95% CI)          | 0.48 (0.45 - 0.51) | 0.58 (0.56 - 0.59) | 0.48 (0.47 - 0.50) | <0.001  | 4        |
| rs1205 T-Dom (95% CI)                   | 0.72 (0.68 - 0.76) | 0.81 (0.79 - 0.83) | 0.73 (0.71 - 0.75) | <0.001  | 2        |
| rs1205 T-Dom p value                    | 0.254              | 0.333              | 0.147              |         | 5        |

253 \* AZ = Arizona, DK = Dakotas, OK = Oklahoma centers

254 1= Independent samples, T-test

255 2= between center Pearson chi-square p value, 3X2 table

256 3= within center binomial confidence interval on proportion

257 4= between center Pearson chi-square p value, 3X3 table

258 5= within center COVID fatal/non-fatal outcome via logistic regression adjusted for age, sex, BMI,  
 259 ANY\_CVD

260

261

262

263 Multivariate logistic regression model findings for the primary SNPs of interest  
 264 are reported in Table 5. Results of the rs1205 T-Dom model is attenuated after  
 265 adjustment for covariates, but retains nominally significant association (OR 1.859, 95%  
 266 CI 1.001-3.453, p=0.049) with COVID-19 in in the combined SHS/SHFS cohorts. Within

267 the younger SHFS cohort, the same model showed an odds ratio of 2.857, 95%CI  
 268 1.108-7.362, p=0.030.  
 269

270 **Table 5. Results of multivariate adjusted models evaluating the composite**  
 271 **outcome of either fatal or non-fatal COVID-19 within the combined SHFS and SHS**  
 272 **cohorts.**

| SHFS and SHS COMBINED         |              |                    |              |              |              |              |
|-------------------------------|--------------|--------------------|--------------|--------------|--------------|--------------|
|                               |              |                    |              | 95% CI       |              |              |
| Multivariate model including: | N            | OR                 | Lower        | Upper        | P value      |              |
| Age                           | 3780         | 0.999              | 0.987        | 1.012        | 0.923        |              |
| Sex                           | 3780         | 0.817              | 0.527        | 1.267        | 0.367        |              |
| AZ center                     | 3780         | Indicator variable |              |              |              |              |
| DK center                     | 3780         | 2.132              | 1.064        | 4.272        | 0.033        |              |
| OK center                     | 3780         | 0.649              | 0.296        | 1.423        | 0.280        |              |
| BMI                           | 3780         | 1.050              | 1.023        | 1.079        | <0.001       |              |
| ANY CVD (Y/N)                 | 3780         | 1.871              | 1.153        | 3.036        | 0.011        |              |
| SHFS COHORT                   |              |                    |              |              |              |              |
|                               |              |                    |              | 95% CI       |              |              |
| SNP*                          | model        | N                  | OR           | Lower        | Upper        | P value      |
| <b>rs1205</b>                 | <b>C-Add</b> | <b>1647</b>        | <b>0.587</b> | <b>0.381</b> | <b>0.905</b> | <b>0.016</b> |
| <b>rs1205</b>                 | <b>T-DOM</b> | <b>1647</b>        | <b>2.857</b> | <b>1.108</b> | <b>7.362</b> | <b>0.030</b> |
| SHS COHORT                    |              |                    |              |              |              |              |
| rs1205                        | C-Add        | 2042               | 1.057        | 0.683        | 1.634        | 0.804        |
| rs1205                        | T-DOM        | 2042               | 1.243        | 0.541        | 2.860        | 0.608        |
| SHFS and SHS COMBINED         |              |                    |              |              |              |              |
| rs1205                        | C-Add        | 3689               | 0.799        | 0.592        | 1.078        | 0.142        |
| <b>rs1205</b>                 | <b>T-DOM</b> | <b>3689</b>        | <b>1.859</b> | <b>1.001</b> | <b>3.453</b> | <b>0.049</b> |

273 \* Genetic variant included in model adjusted for age, sex, center, BMI, and ANY CVD.

274  
 275 In the SHFS analysis, using a generalized linear threshold model in SOLAR to  
 276 adjust for the random effect of family relatedness, and adjusting for fixed effects of sex,  
 277 age, BMI, CVD, and center, either fatal or non-fatal COVID-19 was significantly  
 278 associated with the fixed effect of the rs1205 T allele-dominant genotype (p=0.0003).  
 279 The regression beta for this association was negative (= -0.50 standard deviations),  
 280 indicating a tendency to increase the affected upper tail of the liability distribution (thus  
 281 confirming rs1205-T Dom genotype as a risk allele).

282  
 283 While those with rs1205 T-Dom genotypes trended toward lower mean hsCRP  
 284 levels at baseline than others (p=0.087 excluding levels over 15 mg/L to avoid spurious  
 285 elevations due to intercurrent infections), mean hsCRP levels were not significantly  
 286 different between COVID-19 cases or controls. (Supplemental Table S2).

287

## 288 Discussion

289 We present previously unreported evidence of association between a common  
290 human variant (rs1205) and the clinical impact of the SARS-CoV-2 virus causing  
291 COVID-19. While our study has a modest number of cases, these results derive from a  
292 large cohort of American Indian individuals who are being followed longitudinally using  
293 standardized, physician review of medical records[4] The rs1205 variant has been  
294 recognized as functionally affecting serum levels of CRP,[25,28,29] in several  
295 populations and, in the present SHFS population as well.[50] CRP is an important  
296 component of the innate immune system, thus supporting a role of the gene and this  
297 variant's potential effects on the pathophysiology of COVID-19. A genome-wide  
298 association meta-analysis has reported an intron variant (rs67579710) associated with  
299 COVID-19 hospitalization among 24,741 cases and 2,835,201 controls.[42] This variant  
300 is 4.5Mb from rs1205 [57] and within the thrombospondin3 gene, thus it may play a  
301 role in the thrombosis associated with COVID-19, rather than inflammatory pathways.

302 There are ample theoretical reasons that heritable genetic variation could affect  
303 SARS-CoV-2 infection, beginning with the viral requirement for surface receptors to gain  
304 entry to the cytoplasm[58] and running through multiple immune response pathways  
305 generating the "cytokine storm" which has been prominently noted in the pathogenesis  
306 of COVID-19.[59] A number of genetic variants have been associated with morbidity  
307 and mortality, including variants in the angiotensin converting enzyme 1 (*ACE1*)  
308 gene,[60] the *TMPRSS2* gene,[61] the *IL-6* gene[62] and others extensively reviewed by  
309 Ishak et al.[63] The COVID-19 Host Genetics Initiative, a massive ascertainment of  
310 nearly 50,000 cases from 19 countries has identified 13 genome-wide loci related to  
311 either initial infection, or morbidity.[64]

312 The rs1205 variant is a C/T single nucleotide polymorphism in the 3' untranslated  
313 region of the C-reactive protein gene (*CRP*), with a prevalence of the C allele ranging  
314 from ~ 0.67 in European populations, to ~ 0.40 in Asian populations,[65] and 0.51 to  
315 0.54 in the present study. The 4 *CRP* variants were chosen for their role in the innate  
316 immune system and availability in the SHS dataset, but no literature was found that  
317 examined *CRP* variants related to COVID-19 severity, perhaps because CRP has  
318 traditionally been viewed as a biomarker and not as a potential causal factor. There are,  
319 however, reports of *CRP* variants associated with the clinical outcomes of other  
320 infections[22,23] and the response to vaccination.[26] Additionally, reduced expression  
321 of serum CRP is consistently reported associated with the rs1205 T allele, with the beta  
322 coefficient for each additional T allele ranging between -0.17 and -0.27;[25,28,29] and  
323 estimated at -0.23 in the SHS Dakota center.[50] As noted in Table S2 the mean serum  
324 CRP level is lower in the present study, among those with the rs1205 T-Dom genotype  
325 compared with those homozygous for the C allele, although the difference is not  
326 significant.

327 Although the prevalent view of COVID-19 pathophysiology implicates a  
328 hyperactive immune response (often characterized by increased CRP serum levels as  
329 well as coordinated production of other cytokines), it also seems plausible that a  
330 relative, baseline insufficiency of an innate immune factor, particularly in the early phase  
331 of exposure, could also result in increased morbidity.

332 *CRP* genotypes correlating with increased baseline CRP levels have been  
333 positively associated with risk of pre-eclampsia[46,47,66] and conversely, as in the  
334 current study, *CRP* genotypes (including rs1205 T-Dom) correlated with lower CRP  
335 levels have been associated with increased infectious burden.[22-24] These divergent  
336 effects invite speculation that *CRP* polymorphisms may have experienced balanced  
337 selection during evolution.

338 Our multivariate logistic regression results are in accord with prior studies that  
339 showed the contribution of commonly reported clinical factors, such as age,[67] BMI[64]  
340 and pre-existing CVD,[68,69] which negatively impact COVID-19 outcomes. Although  
341 the mean BMI of the SHFS is somewhat greater than the SHS cohort, it should be noted  
342 that the SHFS cohort has a low prevalence of DM (13%) and is younger than the SHFS,  
343 due to selection for that substudy of those without diabetes at baseline. Perhaps this  
344 allows a clearer genetic (vs an acquired clinical or environmental) association to  
345 become apparent.

346 The small number of cases when stratified by Center suggests cautious  
347 interpretation, but is presented since the number of cases from the Dakota Center is  
348 considerably higher than from the comparable Oklahoma center. Although the  
349 possibility of population stratification confounding our results is present, we believe the  
350 fact that all 3 centers show an effect of the T-Dom genotype in the same direction,  
351 including the Arizona Center, which is likely to be most distant in their genetic  
352 background, suggests genetic background effects are not likely. The statistical  
353 significance of the center covariate could be due to various differences in regional,  
354 environmental factors, such as household density, weather, and accessibility of medical  
355 care.

356 The lack of significant results in the other SNPs is not surprising, given the  
357 number of these variants with low allele frequencies and the small number of COVID-19  
358 cases. Further surveillance of the SHS cohort will likely identify new cases and improve  
359 the power for other variants (eg rs111837807 and rs2109069).

360 The limitations of this analysis are chiefly related to the relatively small number of  
361 cases obtained to this point. The morbid case ascertainment is subject to undercounting  
362 since the choice of medical records for review is based primarily on CVD outcomes.  
363 This does not affect ascertainment of mortal cases, since all deaths are reviewed and  
364 recorded as soon as possible. The possibility of population stratification is noted,  
365 although seems unlikely for reasons noted above. P values have not been adjusted for  
366 multiple testing.



367 The study's strengths include a robust physician assignment of outcomes using  
368 medical records and comprehensive analysis of genetic variabilities as well as  
369 adjustment for relatedness between individuals.

370 It is clear that race/ethnicity is a valid and critical risk marker for other underlying  
371 conditions affecting the complexity of COVID-19 disease, such as structural racism,  
372 discrimination and socioeconomic status,[70] lack of health care access,[71] and  
373 exposure to infectious agents related to high risk and service industry occupations.[72]  
374 Although one can never be confident that all confounding factors have been adjusted  
375 properly, Williamson et al[2] showed that ethnicity among a very large cohort in England  
376 was associated with COVID-19 outcomes, even after adjusting for socioeconomic  
377 factors. Thus, even though we are committed to improving our understanding of the  
378 complex social and behavioral factors influencing COVID-19 disease landscape among  
379 Tribal communities we also believe that investigating the potential influence of common  
380 genetic variants among the high risk American Indian/Alaska Native populations may  
381 provide opportunities for therapeutic or preventive options. Although severely impacted  
382 by COVID-19,[73,74] Tribal communities are, at times, excluded from scientific studies  
383 due to their smaller proportion in the U.S. population and various socio-political factors.

384 In conclusion, a statistically significant association was found between the rs1205  
385 T-Dom genotype and risk of COVID-19 death or hospitalization among American Indian  
386 participants, employing chi-square tests, logistic regression models adjusting for age,  
387 sex, center, BMI and prior history of CVD, and SOLAR software analysis also adjusting  
388 for relatedness within the SHFS cohort. The direction of effect suggests a lower level of  
389 CRP during early phases of infection may increase the risk of subsequent  
390 complications, a novel finding we will continue to investigate further as the pandemic  
391 continues and our samples size tragically continues to increase.

392 Supporting Information:

393 Supplemental Table 1. Additional univariant associations with either fatal or non-  
394 fatal COVID-19.

395 Supplemental Table 2. Baseline hsCRP measures\* in relation to rs1205 T-Dom  
396 genotype and COVID-19 case/control status.

397

398 Acknowledgements:

399 We thank the study participants, Indian Health Service facilities, and participating Tribal  
400 communities for their extraordinary cooperation and involvement, which has been  
401 critical to the success of the Strong Heart Study since 1988.

402 References:

- 403 1. Risk for COVID-19 Infection, Hospitalization, and Death By Race/Ethnicity,  
404 [https://www.cdc.gov/coronavirus/2019-ncov/covid-data/investigations-  
406 discovery/hospitalization-death-by-race-ethnicity.html](https://www.cdc.gov/coronavirus/2019-ncov/covid-data/investigations-<br/>405 discovery/hospitalization-death-by-race-ethnicity.html) (accessed 1/7/2022)
- 407 2. Williamson EJ, Walker AJ, Bhaskaran K, et al. Factors associated with COVID-  
408 19-related death using OpenSAFELY. *Nature*. 2020 Aug;584(7821):430-436. doi:  
409 10.1038/s41586-020-2521-4. Epub 2020 Jul 8. PMID: 32640463; PMCID:  
410 PMC7611074.
- 411 3. Ferreira de Araújo JL, Menezes D, Saraiva-Duarte JM, et al. Systematic review  
412 of host genetic association with Covid-19 prognosis and susceptibility: What have  
413 we learned in 2020? *Rev Med Virol*. 2021 Aug 2:e2283. doi: 10.1002/rmv.2283.  
414 Epub ahead of print. PMID: 34338380.
- 415 4. Lee ET, Welty TK, Fabsitz R, Cowan LD, Le NA, Oopik AJ, et al. The Strong  
416 Heart Study. A study of cardiovascular disease in American Indians: design and  
417 methods. *Am J Epidemiol*. 1990 Dec;132(6):1141-55. PMID: 2260546.
- 418 5. North KE, Howard BV, Welty TK, Best LG, Lee ET, Yeh JL, et al. Genetic and  
419 environmental contributions to cardiovascular disease risk in American Indians:  
420 the strong heart family study. *Am J Epidemiol*. 2003 Feb 15;157(4):303-14.  
421 PMID: 12578801.
- 422 6. Xu J, Lee ET, Peterson LE, Devereux RB, Rhoades ER, Umans JG, et al.  
423 Differences in risk factors for coronary heart disease among diabetic and  
424 nondiabetic individuals from a population with high rates of diabetes: the Strong  
425 Heart Study. *J Clin Endocrinol Metab*. 2012 Oct;97(10):3766-74. doi:  
426 10.1210/jc.2012-2110. Epub 2012 Jul 16. PMID: 22802089; PMCID:  
427 PMC3674295.
- 428 7. Lu W, Resnick HE, Jablonski KA, Jones KL, Jain AK, Howard WJ, et al. Non-  
429 HDL cholesterol as a predictor of cardiovascular disease in type 2 diabetes: the  
430 strong heart study. *Diabetes Care*. 2003 Jan;26(1):16-23. doi:  
431 10.2337/diacare.26.1.16. PMID: 12502653.
- 432 8. Gómez J, Albaiceta GM, Cuesta-Llavona E, García-Clemente M, López-Larrea  
433 C, Amado-Rodríguez L, et al. The Interferon-induced transmembrane protein 3  
434 gene (IFITM3) rs12252 C variant is associated with COVID-19. *Cytokine*. 2021  
435 Jan;137:155354. doi: 10.1016/j.cyto.2020.155354. Epub 2020 Oct 23. PMID:  
436 33113474.
- 437 9. Zhang Q, Bastard P, Liu Z, Le Pen J, Moncada-Velez M, et al. Inborn errors of  
438 type I IFN immunity in patients with life-threatening COVID-19. *Science*. 2020  
439 Oct 23;370(6515):eabd4570. doi: 10.1126/science.abd4570. Epub 2020 Sep 24.  
440 PMID: 32972995; PMCID: PMC7857407.
- 441 10. Kuo CL, Pilling LC, Atkins JL, Masoli JAH, Delgado J, Kuchel GA, et al. APOE e4  
442 Genotype Predicts Severe COVID-19 in the UK Biobank Community Cohort. *J  
443 Gerontol A Biol Sci Med Sci*. 2020 Oct 15;75(11):2231-2232. doi:  
444 10.1093/gerona/glaa131. PMID: 32451547; PMCID: PMC7314139.
- 445 11. Latini A, Agolini E, Novelli A, Borgiani P, Giannini R, Gravina P, et al. COVID-19  
446 and Genetic Variants of Protein Involved in the SARS-CoV-2 Entry into the Host  
447 Cells. *Genes (Basel)*. 2020 Aug 27;11(9):1010. doi: 10.3390/genes11091010.  
PMID: 32867305; PMCID: PMC7565048.

- 448 12. Ghafouri-Fard S, Noroozi R, Vafae R, Branicki W, Pośpiech E, Pyrc K, et al.  
449 Effects of host genetic variations on response to, susceptibility and severity of  
450 respiratory infections. *Biomed Pharmacother*. 2020 Aug;128:110296. doi:  
451 10.1016/j.biopha.2020.110296. Epub 2020 May 29. PMID: 32480226; PMCID:  
452 PMC7258806.
- 453 13. Jafarpour R, Pashangzadeh S, Dowran R. Host factors: Implications in  
454 immunopathogenesis of COVID-19. *Pathol Res Pract*. 2021 Dec;228:153647.  
455 doi: 10.1016/j.prp.2021.153647. Epub 2021 Oct 12. PMID: 34749207; PMCID:  
456 PMC8505027.
- 457 14. Saulle I, Vicentini C, Clerici M, Biasin M. Antigen presentation in SARS-CoV-2  
458 infection: the role of class I HLA and ERAP polymorphisms. *Hum Immunol*. 2021  
459 Aug;82(8):551-560. doi: 10.1016/j.humimm.2021.05.003. Epub 2021 May 10.  
460 PMID: 34116863; PMCID: PMC8108382.
- 461 15. Littera R, Campagna M, Deidda S, Angioni G, Cipri S, Melis M, et al. Human  
462 Leukocyte Antigen Complex and Other Immunogenetic and Clinical Factors  
463 Influence Susceptibility or Protection to SARS-CoV-2 Infection and Severity of  
464 the Disease Course. The Sardinian Experience. *Front Immunol*. 2020 Dec  
465 4;11:605688. doi: 10.3389/fimmu.2020.605688. PMID: 33343579; PMCID:  
466 PMC7746644.
- 467 16. Gómez J, Albaiceta GM, García-Clemente M, García-Gala JM, Coto E. DNA  
468 genotyping of the ABO gene showed a significant association of the A-group  
469 (A1/A2 variants) with severe COVID-19. *Eur J Intern Med*. 2021 Jun;88:129-132.  
470 doi: 10.1016/j.ejim.2021.02.016. Epub 2021 Feb 25. PMID: 33750629; PMCID:  
471 PMC7906510.
- 472 17. Pereira E, Felipe S, de Freitas R, Araújo V, Soares P, Ribeiro J, et al. ABO blood  
473 group and link to COVID-19: A comprehensive review of the reported  
474 associations and their possible underlying mechanisms. *Microb Pathog*. 2022  
475 Jun 25;169:105658. doi: 10.1016/j.micpath.2022.105658. Epub ahead of print.  
476 PMID: 35764188; PMCID: PMC9233352.
- 477 18. Tamayo-Velasco Á, Peñarrubia-Ponce MJ, Álvarez FJ, de la Fuente I, Pérez-  
478 González S, Andaluz-Ojeda D. ABO Blood System and COVID-19 Susceptibility:  
479 Anti-A and Anti-B Antibodies Are the Key Points. *Front Med (Lausanne)*. 2022  
480 Apr 25;9:882477. doi: 10.3389/fmed.2022.882477. PMID: 35547235; PMCID:  
481 PMC9081929.
- 482 19. <https://www.covid19hg.org>, accessed 3/1/23.
- 483 20. de Araújo JLF, Menezes D, de Aguiar RS, de Souza RP. *IFITM3*, *FURIN*, *ACE1*,  
484 and *TNF-α* Genetic Association With COVID-19 Outcomes: Systematic Review  
485 and Meta-Analysis. *Front Genet*. 2022 Apr 1;13:775246. doi:  
486 10.3389/fgene.2022.775246. PMID: 35432458; PMCID: PMC9010674.
- 487 21. Gkouskou K, Vasilogiannakopoulou T, Andreacos E, Davanos N, Gazouli M,  
488 Sanoudou D, et al. COVID-19 enters the expanding network of apolipoprotein E4-  
489 related pathologies. *Redox Biol*. 2021 May;41:101938. doi:  
490 10.1016/j.redox.2021.101938. Epub 2021 Mar 10. PMID: 33730676; PMCID:  
491 PMC7943392.
- 492 22. Liu C, Jin P, Luo Y, Xu J, Kong C, Chen J, et al. Association of Single-Nucleotide  
493 Polymorphisms of C-Reactive Protein Gene with Susceptibility to Infantile Sepsis

- 494 in Southern China. *Med Sci Monit.* 2018 Jan 30;24:590-595. doi:  
495 10.12659/msm.908602. PMID: 29379005; PMCID: PMC5800323.
- 496 23. Chou SC, Ko HW, Lin YC. CRP/IL-6/IL-10 Single-Nucleotide Polymorphisms  
497 Correlate with the Susceptibility and Severity of Community-Acquired  
498 Pneumonia. *Genet Test Mol Biomarkers.* 2016 Dec;20(12):732-740. doi:  
499 10.1089/gtmb.2016.0156. Epub 2016 Oct 5. Erratum in: *Genet Test Mol*  
500 *Biomarkers.* 2019 Jun;23(6):433. PMID: 27705004.
- 501 24. Ponasenko AV, Kutikhin AG, Khutornaya MV, Rutkovskaya NV, Kondyukova NV,  
502 Odarenko YN, et al. Inherited Variation in Cytokine, Acute Phase Response, and  
503 Calcium Metabolism Genes Affects Susceptibility to Infective Endocarditis.  
504 *Mediators Inflamm.* 2017;2017:7962546. doi: 10.1155/2017/7962546. Epub 2017  
505 Jun 4. PMID: 28659664; PMCID: PMC5474236.
- 506 25. Kocarnik JM, Pendergrass SA, Carty CL, Pankow JS, Schumacher FR, Cheng I,  
507 et al. Multiancestral analysis of inflammation-related genetic variants and C-  
508 reactive protein in the population architecture using genomics and epidemiology  
509 study. *Circ Cardiovasc Genet.* 2014 Apr; 7(2):178–88. <https://doi.org/10.1161/CIRCGENETICS.113.000173> Epub 2014 Mar 12. PMID: 24622110;  
510 PubMed Central PMCID: PMC4104750.
- 511 26. Ovsyannikova IG, White SJ, Larrabee BR, Grill DE, Jacobson RM, Poland GA.  
512 Leptin and leptin-related gene polymorphisms, obesity, and influenza A/H1N1  
513 vaccine-induced immune responses in older individuals. *Vaccine.* 2014 Feb  
514 7;32(7):881-7. doi: 10.1016/j.vaccine.2013.12.009. Epub 2013 Dec 18. PMID:  
515 24360890; PMCID: PMC3922536.
- 516 27. Mõlkänen T, Rostila A, Ruotsalainen E, Alanne M, Perola M, Järvinen A. Genetic  
517 polymorphism of the C-reactive protein (CRP) gene and a deep infection focus  
518 determine maximal serum CRP level in *Staphylococcus aureus* bacteremia. *Eur*  
519 *J Clin Microbiol Infect Dis.* 2010 Sep;29(9):1131-7. doi: 10.1007/s10096-010-  
520 0978-z. Epub 2010 Jun 16. PMID: 20552244.
- 521 28. Ridker PM, Pare G, Parker A, Zee RY, Danik JS, Buring JE, et al. Loci related to  
522 metabolic-syndrome pathways including LEPR, HNF1A, IL6R, and GCKR  
523 associate with plasma C-reactive protein: the Women's Genome Health Study.  
524 *Am J Hum Genet.* 2008 May; 82(5):1185–92. [https://doi.org/10.](https://doi.org/10.1016/j.ajhg.2008.03.015)  
525 [1016/j.ajhg.2008.03.015](https://doi.org/10.1016/j.ajhg.2008.03.015) Epub 2008 Apr 24. PMID: 18439548; PubMed Central  
526 PMCID: PMC2427311.
- 527 29. Wang S, Xu H, Zhou N, Zhao W, Wu D, Shen B. Combined Effects of Single  
528 Nucleotide Polymorphisms (SNPs) within C-reactive Protein (CRP) and  
529 Environmental Parameters on Risk and Prognosis for Diabetic Foot  
530 Osteomyelitis Patients. *Exp Clin Endocrinol Diabetes.* 2020 Aug;128(8):528-539.  
531 doi: 10.1055/a-0754-5622. Epub 2020 Jun 15. PMID: 32542640.
- 532 30. Myburgh PH, Nienaber-Rousseau C, Kruger IM, Towers GW. Education,  
533 Smoking and *CRP* Genetics in Relation to C-Reactive Protein Concentrations in  
534 Black South Africans. *Int J Environ Res Public Health.* 2020 Sep 11;17(18):6646.  
535 doi: 10.3390/ijerph17186646. PMID: 32933066; PMCID: PMC7558133.
- 536 31. Schick UM, Auer PL, Bis JC, Lin H, Wei P, Pankratz N, et al.; Cohorts for Heart  
537 and Aging Research in Genomic Epidemiology; National Heart, Lung, and Blood  
538 Institute GO Exome Sequencing Project. Association of exome sequences with  
539



- 540 plasma C-reactive protein levels in >9000 participants. *Hum Mol Genet.* 2015 Jan  
541 15; 24(2):559–71. <https://doi.org/10.1093/hmg/ddu450> Epub 2014 Sep 3. PMID:  
542 25187575; PubMed Central PMCID:PMC4334838.
- 543 32. Mohammadpour S, Torshizi Esfahani A, Halaji M, Lak M, Ranjbar R. An updated  
544 review of the association of host genetic factors with susceptibility and resistance  
545 to COVID-19. *J Cell Physiol.* 2021 Jan;236(1):49-54. doi: 10.1002/jcp.29868.  
546 Epub 2020 Jun 15. PMID: 32542735; PMCID: PMC7323230.
- 547 33. Saulle I, Vanetti C, Goglia S, Vicentini C, Tombetti E, Garziano M, et al. New  
548 ERAP2/Iso3 Isoform Expression Is Triggered by Different Microbial Stimuli in  
549 Human Cells. Could It Play a Role in the Modulation of SARS-CoV-2 Infection?  
550 *Cells.* 2020 Aug 24;9(9):1951. doi: 10.3390/cells9091951. PMID: 32847031;  
551 PMCID: PMC7563522.
- 552 34. D'Amico S, Tempora P, Lucarini V, Melaiu O, Gaspari S, Algeri M, et al. ERAP1  
553 and ERAP2 Enzymes: A Protective Shield for RAS against COVID-19? *Int J Mol*  
554 *Sci.* 2021 Feb 8;22(4):1705. doi: 10.3390/ijms22041705. PMID: 33567739;  
555 PMCID: PMC7914632.
- 556 35. Karcioğlu Batur L, Hekim N. Correlation between interleukin gene polymorphisms  
557 and current prevalence and mortality rates due to novel coronavirus disease  
558 2019 (COVID-2019) in 23 countries. *J Med Virol.* 2021 Oct;93(10):5853-5863.  
559 doi: 10.1002/jmv.27127. Epub 2021 Jun 10. PMID: 34081354; PMCID:  
560 PMC8242628.
- 561 36. Smieszek SP, Przychodzen BP, Polymeropoulos VM, Polymeropoulos CM,  
562 Polymeropoulos MH. Assessing the potential correlation of polymorphisms in the  
563 IL6R with relative IL6 elevation in severely ill COVID-19 patients'. *Cytokine.* 2021  
564 Dec;148:155662. doi: 10.1016/j.cyto.2021.155662. Epub 2021 Jul 29. Erratum in:  
565 *Cytokine.* 2022 Jan;149:155752. PMID: 34353696; PMCID: PMC8318728.
- 566 37. Severe Covid-19 GWAS Group; Ellinghaus D, Degenhardt F, Bujanda L, Buti M,  
567 Albillos A, Invernizzi P, et al. Genomewide Association Study of Severe Covid-19  
568 with Respiratory Failure. *N Engl J Med.* 2020 Oct 15;383(16):1522-1534. doi:  
569 10.1056/NEJMoa2020283. Epub 2020 Jun 17. PMID: 32558485; PMCID:  
570 PMC7315890.
- 571 38. Kolin DA, Kulm S, Christos PJ, Elemento O. Clinical, regional, and genetic  
572 characteristics of Covid-19 patients from UK Biobank. *PLoS One.* 2020 Nov  
573 17;15(11):e0241264. doi: 10.1371/journal.pone.0241264. PMID: 33201886;  
574 PMCID: PMC7671499.
- 575 39. Lehrer S, Rheinstein PH. ABO blood groups, COVID-19 infection and mortality.  
576 *Blood Cells Mol Dis.* 2021 Jul;89:102571. doi: 10.1016/j.bcmd.2021.102571.  
577 Epub 2021 Apr 21. PMID: 33894687; PMCID: PMC8059281.
- 578 40. Velavan TP, Pallerla SR, Rüter J, Augustin Y, Kremsner PG, Krishna S, et al.  
579 Host genetic factors determining COVID-19 susceptibility and severity.  
580 *EBioMedicine.* 2021 Oct;72:103629. doi: 10.1016/j.ebiom.2021.103629. Epub  
581 2021 Oct 13. PMID: 34655949; PMCID: PMC8512556.
- 582 41. Pairo-Castineira E, Clohisey S, Klaric L, Bretherick AD, Rawlik K, Pasko D, et al.  
583 Genetic mechanisms of critical illness in COVID-19. *Nature.* 2021  
584 Mar;591(7848):92-98. doi: 10.1038/s41586-020-03065-y. Epub 2020 Dec 11.  
585 PMID: 33307546.

- 586 42. <https://app.covid19hg.org/variants>, accessed 12/15/22.
- 587 43. Szyda J, Dobosz P, Stojak J, Sypniewski M, Suchocki T, Kotlarz K, et al. Beyond  
588 GWAS-Could Genetic Differentiation within the Allograft Rejection Pathway  
589 Shape Natural Immunity to COVID-19? *Int J Mol Sci.* 2022 Jun 3;23(11):6272.  
590 doi: 10.3390/ijms23116272. PMID: 35682950; PMCID: PMC9181155.
- 591 44. Nimptsch K, Aleksandrova K, Fedirko V, Jenab M, Gunter MJ, Siersema PD, et  
592 al. Pre-diagnostic C-reactive protein concentrations, CRP genetic variation and  
593 mortality among individuals with colorectal cancer in Western European  
594 populations. *BMC Cancer.* 2022 Jun 24;22(1):695. doi: 10.1186/s12885-022-  
595 09778-9. PMID: 35739525; PMCID: PMC9229883.
- 596 45. Pan HY, Mi YY, Xu K, Zhang Z, Wu H, Zhang W, et al. Association of C-reactive  
597 protein (CRP) rs1205 and rs2808630 variants and risk of cancer. *J Cell Physiol.*  
598 2020 Nov;235(11):8571-8584. doi: 10.1002/jcp.29701. Epub 2020 Apr 24. PMID:  
599 32329054.
- 600 46. Best LG, Saxena R, Anderson CM, Barnes MR, Hakonarson H, Falcon G, et al.  
601 Two variants of the C-reactive protein gene are associated with risk of pre-  
602 eclampsia in an American Indian population. *PLoS One.* 2013 Aug  
603 5;8(8):e71231. doi: 10.1371/journal.pone.0071231. Erratum in: *PLoS One.* 2013  
604 Sep 23;8(9):null. PMID: 23940726; PMCID: PMC3733916.
- 605 47. Best LG, Nadeau M, Davis K, Lamb F, Bercier S, Anderson CM. Genetic  
606 variants, immune function, and risk of pre-eclampsia among American Indians.  
607 *Am J Reprod Immunol.* 2012 Feb;67(2):152-9. doi: 10.1111/j.1600-  
608 0897.2011.01076.x. Epub 2011 Oct 17. PMID: 22004660; PMCID: PMC3253256.
- 609 48. Shara NM, Wang H, Valaitis E, Pehlivanova M, Carter EA, Resnick HE, et al.  
610 Comparison of estimated glomerular filtration rates and albuminuria in predicting  
611 risk of coronary heart disease in a population with high prevalence of diabetes  
612 mellitus and renal disease. *Am J Cardiol.* 2011 Feb 1;107(3):399-405. doi:  
613 10.1016/j.amjcard.2010.09.036. PMID: 21257005; PMCID: PMC3035999.
- 614 49. Wang H, Shara NM, Lee ET, Devereux R, Calhoun D, de Simone G, et al.  
615 Hemoglobin A1c, fasting glucose, and cardiovascular risk in a population with  
616 high prevalence of diabetes: the strong heart study. *Diabetes Care.* 2011  
617 Sep;34(9):1952-8. doi: 10.2337/dc11-0329. Epub 2011 Jul 25. PMID: 21788631;  
618 PMCID: PMC3161283.
- 619 50. Best LG, Balakrishnan P, Cole SA, Haack K, Kocarnik JM, Pankratz N, et al.  
620 Genetic analysis of hsCRP in American Indians: The Strong Heart Family Study.  
621 *PLoS One.* 2019 Oct 17;14(10):e0223574. doi: 10.1371/journal.pone.0223574.  
622 PMID: 31622379; PMCID: PMC6797125.
- 623 51. Voight BF, Kang HM, Ding J, et al. The metabochip, a custom genotyping array  
624 for genetic studies of metabolic, cardiovascular, and anthropometric traits. *PLoS*  
625 *Genet.* 2012;8(8):e1002793. doi: 10.1371/journal.pgen.1002793. Epub 2012 Aug  
626 2. Erratum in: *PLoS Genet.* 2013 Apr;9(4). doi:10.1371/annotation/0b4e9c8b-  
627 35c5-4dbd-b95b-0640250fbc87. PMID: 22876189; PubMed Central PMCID:  
628 PMC3410907.
- 629 52. Almasy L, Blangero J. Multipoint quantitative-trait linkage analysis in general  
630 pedigrees. *Am J Hum Genet.* 1998. 62:1198-1211.
- 631 53. <https://solar-eclipse-genetics.org>



- 632 54. Falconer DS, Mackay FC. *Introduction to Quantitative Genetics*, 4<sup>th</sup> ed. Harlow:  
633 Prentice Hall. pp. 299-309.
- 634 55. US CDC. COVID data tracker: weekly case trends – the United States.  
635 <https://covid.cdc.gov/covid-data-tracker/#datatracker-home> . Accessed  
636 10/24/2022.
- 637 56. Williams JT, Blangero J. Power of variance component linkage analysis – II.  
638 Discrete traits. *Ann Hum Genet*, 2004. 68:620-632.
- 639 57. <http://genome.ucsc.edu/>, accessed 12/15/22
- 640 58. Sturrock BR, Milne KM, Chevassut TJ. The renin-angiotensin system - a  
641 therapeutic target in COVID-19? *Clin Med (Lond)*. 2020 Jul;20(4):e72-e75. doi:  
642 10.7861/clinmed.2020-0146. Epub 2020 May 15. PMID: 32414711; PMCID:  
643 PMC7385758.
- 644 59. Rasmi Y, Hatamkhani S, Naderi R, Shokati A, Nayeb Zadeh V, Hosseinzadeh F,  
645 et al. Molecular signaling pathways, pathophysiological features in various  
646 organs, and treatment strategies in SARS-CoV2 infection. *Acta Histochem*. 2022  
647 Jul;124(5):151908. doi: 10.1016/j.acthis.2022.151908. Epub 2022 May 25. PMID:  
648 35662001; PMCID: PMC9130726.
- 649 60. Saad H, Jabotian K, Sakr C, Mahfouz R, Akl IB, Zgheib NK. The Role of  
650 Angiotensin Converting Enzyme 1 Insertion/Deletion Genetic Polymorphism in  
651 the Risk and Severity of COVID-19 Infection. *Front Med (Lausanne)*. 2021 Dec  
652 23;8:798571. doi: 10.3389/fmed.2021.798571. PMID: 35004773; PMCID:  
653 PMC8733297.
- 654 61. Rokni M, Heidari Nia M, Sarhadi M, Mirinejad S, Sargazi S, Moudi M, et al.  
655 Association of TMPRSS2 Gene Polymorphisms with COVID-19 Severity and  
656 Mortality: a Case-Control Study with Computational Analyses. *Appl Biochem  
657 Biotechnol*. 2022 Aug;194(8):3507-3526. doi: 10.1007/s12010-022-03885-w.  
658 Epub 2022 Apr 7. PMID: 35386063; PMCID: PMC8986508.
- 659 62. Giannitrapani L, Augello G, Mirarchi L, Amodeo S, Veronese N, Sasso BL, et al.  
660 Outcome predictors in SARS-CoV-2 disease (COVID-19): The prominent role of  
661 IL-6 levels and an IL-6 gene polymorphism in a western Sicilian population. *J  
662 Infect*. 2022 Aug;85(2):174-211. doi: 10.1016/j.jinf.2022.04.043. Epub 2022 Apr  
663 29. PMID: 35490738; PMCID: PMC9050196.
- 664 63. Ishak A, Mehendale M, AlRawashdeh MM, Sestacovschi C, Sharath M, Pandav  
665 K, et al. The association of COVID-19 severity and susceptibility and genetic risk  
666 factors: A systematic review of the literature. *Gene*. 2022 Jun 14;836:146674.  
667 doi: 10.1016/j.gene.2022.146674. Epub ahead of print. PMID: 35714803;  
668 PMCID: PMC9195407.
- 669 64. COVID-19 Host Genetics Initiative. Mapping the human genetic architecture of  
670 COVID-19. *Nature*. 2021 Dec;600(7889):472-477. doi: 10.1038/s41586-021-  
671 03767-x. Epub 2021 Jul 8. PMID: 34237774; PMCID: PMC8674144.
- 672 65. <https://www.ncbi.nlm.nih.gov/snp/rs1205>, 7/24/23.
- 673 66. Wang Y, Wang Q, Guo C, Wang S, Wang X, An L, et al. Association between  
674 CRP gene polymorphisms and the risk of preeclampsia in Han Chinese women.  
675 *Genet Test Mol Biomarkers*. 2014 Nov;18(11):775-80. doi:  
676 10.1089/gtmb.2014.0142. Epub 2014 Oct 14. PMID: 25314633.

- 677 67. Rod JE, Oviedo-Trespalacios O, Cortes-Ramirez J. A brief-review of the risk  
678 factors for covid-19 severity. *Rev Saude Publica*. 2020;54:60. doi:  
679 10.11606/s1518-8787.2020054002481. Epub 2020 Jun 1. PMID: 32491116;  
680 PMCID: PMC7263798.
- 681 68. Dan S, Pant M, Upadhyay SK. The Case Fatality Rate in COVID-19 Patients  
682 With Cardiovascular Disease: Global Health Challenge and Paradigm in the  
683 Current Pandemic. *Curr Pharmacol Rep*. 2020;6(6):315-324. doi:  
684 10.1007/s40495-020-00239-0. Epub 2020 Sep 15. PMID: 32953401; PMCID:  
685 PMC7490208.
- 686 69. Wilk-Sledziowska K, Sielatycki PJ, Uscinska N, Bujno E, Rosolowski M,  
687 Kakareko K, et al. The Impact of Cardiovascular Risk Factors on the Course of  
688 COVID-19. *J Clin Med*. 2022 Apr 18;11(8):2250. doi: 10.3390/jcm11082250.  
689 PMID: 35456343; PMCID: PMC9026388.
- 690 70. Andrasik MP, Maunakea AK, Oseso L, Rodriguez-Diaz CE, Wallace S, Walters  
691 K, et al. Awakening: The Unveiling of Historically Unaddressed Social Inequities  
692 During the COVID-19 Pandemic in the United States. *Infect Dis Clin North Am*.  
693 2022 Jun;36(2):295-308. doi: 10.1016/j.idc.2022.01.009. Epub 2022 Feb 1.  
694 PMID: 35636901; PMCID: PMC8806123.
- 695 71. Khanijahani A, Iezadi S, Gholipour K, Azami-Aghdash S, Naghibi D. A systematic  
696 review of racial/ethnic and socioeconomic disparities in COVID-19. *Int J Equity  
697 Health*. 2021 Nov 24;20(1):248. doi: 10.1186/s12939-021-01582-4. PMID:  
698 34819081; PMCID: PMC8611382.
- 699 72. Koh D. Occupational risks for COVID-19 infection. *Occup Med (Lond)*. 2020 Mar  
700 12;70(1):3-5. doi: 10.1093/occmed/kqaa036. PMID: 32107548; PMCID:  
701 PMC7107962.
- 702 73. Kovich H. Rural Matters - Coronavirus and the Navajo Nation. *N Engl J Med*.  
703 2020;383(2):105-107. doi:10.1056/NEJMp2012114
- 704 74. Cohen, P. N. (2020). The COVID-19 Epidemic in Rural U.S. Counties. *European  
705 Journal of Environment and Public Health*, 4(2),  
706 em0050. <https://doi.org/10.29333/ejeph/8331>  
707  
708
